# Supplementary material for: Structure of Tris[2-(4-pyridyl)ethyl]phosphine, Tris[2-(2-pyridyl)ethyl]phosphine, and Their Chalcogenides in Solution: Dipole Moments, IR Spectroscopy, and DFT Study
Source: MDPI journal article supplement (doi:10.3390/molecules29010110), 2023-12-23
Supplement: s1 [file s1]

## Supplementary Materials

### Structure of Tris[2-(4-pyridyl)ethyl]phosphine, Tris[2-(2-pyridyl)ethyl]phosphine, and Their Chalcogenides in Solution: Dipole Moments, IR Spectroscopy, DFT Study

Anastasiia A. Kuznetsova <sup>1</sup>, Denis V. Chachkov <sup>2</sup>, Natalia A. Belogorlova <sup>3</sup>, Svetlana F. Malysheva <sup>3</sup> and Yana A. Vereshchagina <sup>1,\*</sup>

- <sup>1</sup> Department of Physical Chemistry, A.M. Butlerov Institute of Chemistry, Kazan Federal University, Kremlevskaya 18, 420008 Kazan, Russia; kuznetsovaanastan@gmail.com
- <sup>2</sup> Kazan Department of Joint Supercomputer Center of Russian Academy of Sciences–Branch of Federal Scientific Center “Scientific Research Institute for System Analysis of the RAS”, Lobachevskogo 2/31, 420111 Kazan, Russia; de2005c@gmail.com
- <sup>3</sup> A.E. Favorsky Irkutsk Institute of Chemistry, Siberian Branch of the Russian Academy of Sciences, Favorskogo 1, 664033 Irkutsk, Russia; mal@irioch.irk.ru
- \* Correspondence: jveresch@kpfu.ru

#### Contents

|                                                                                                                                                                                                                                      |      |
|--------------------------------------------------------------------------------------------------------------------------------------------------------------------------------------------------------------------------------------|------|
| Equations for $\alpha$ and $\gamma$ calculations (Guggenheim-Smith equation)                                                                                                                                                         | pS2  |
| Figure S1. The $\varepsilon_i-w_i$ and $n_i^2-w_i$ plots for compounds <b>1–4</b> , trichloromethane solutions.                                                                                                                      | pS3  |
| Figure S2. The $\varepsilon_i-w_i$ and $n_i^2-w_i$ plots for compounds <b>5</b> , <b>7</b> , and <b>8</b> , trichloromethane solutions.                                                                                              | pS4  |
| Figure S3. The $\varepsilon_i-w_i$ and $n_i^2-w_i$ plots for compounds <b>5</b> (1,4-dioxane solutions) and <b>8</b> (tetrachloromethane solutions).                                                                                 | pS5  |
| Table S1. Values of the slope ( $\alpha$ or $\gamma$ ) and the intercept of the linear $\varepsilon_i-w_i$ and $n_i^2-w_i$ dependences and standard errors of regression parameters for compounds <b>1–5</b> , <b>7</b> , <b>8</b> . | pS6  |
| Table S2. Selected vibration frequencies of <b>2–4</b> ; theoretical values are listed for conformers <b>a–f</b> .                                                                                                                   | pS7  |
| Figure S4. FT-IR spectra of compound <b>3</b> in different aggregate states.                                                                                                                                                         | pS8  |
| Figure S5. FT-IR spectra of compound <b>4</b> in different aggregate states.                                                                                                                                                         | pS9  |
| Table S3. Selected vibration frequencies of <b>7</b> , <b>8</b> ; theoretical values are listed for conformers <b>7a–c</b> , <b>7f</b> , <b>7h–j</b> and <b>8a–c</b> , <b>8e–g</b> , <b>8j</b> .                                     | pS10 |

Equations for  $\alpha$  and  $\gamma$  calculations (Guggenheim-Smith equation):

$$\alpha = \frac{\varepsilon_i - \varepsilon_0}{w_i},$$

$$\gamma = \frac{n_i^2 - n_0^2}{w_i},$$

where  $\alpha$  and  $\gamma$  are slopes of the  $\varepsilon_i$ - $w_i$  and  $n_i^2$ - $w_i$  plots;  $\varepsilon_i$ ,  $n_i$ , and  $w_i$  are the dielectric permittivity, refractive index, and weigh fraction of the solute of the  $i^{\text{th}}$  solution, respectively.

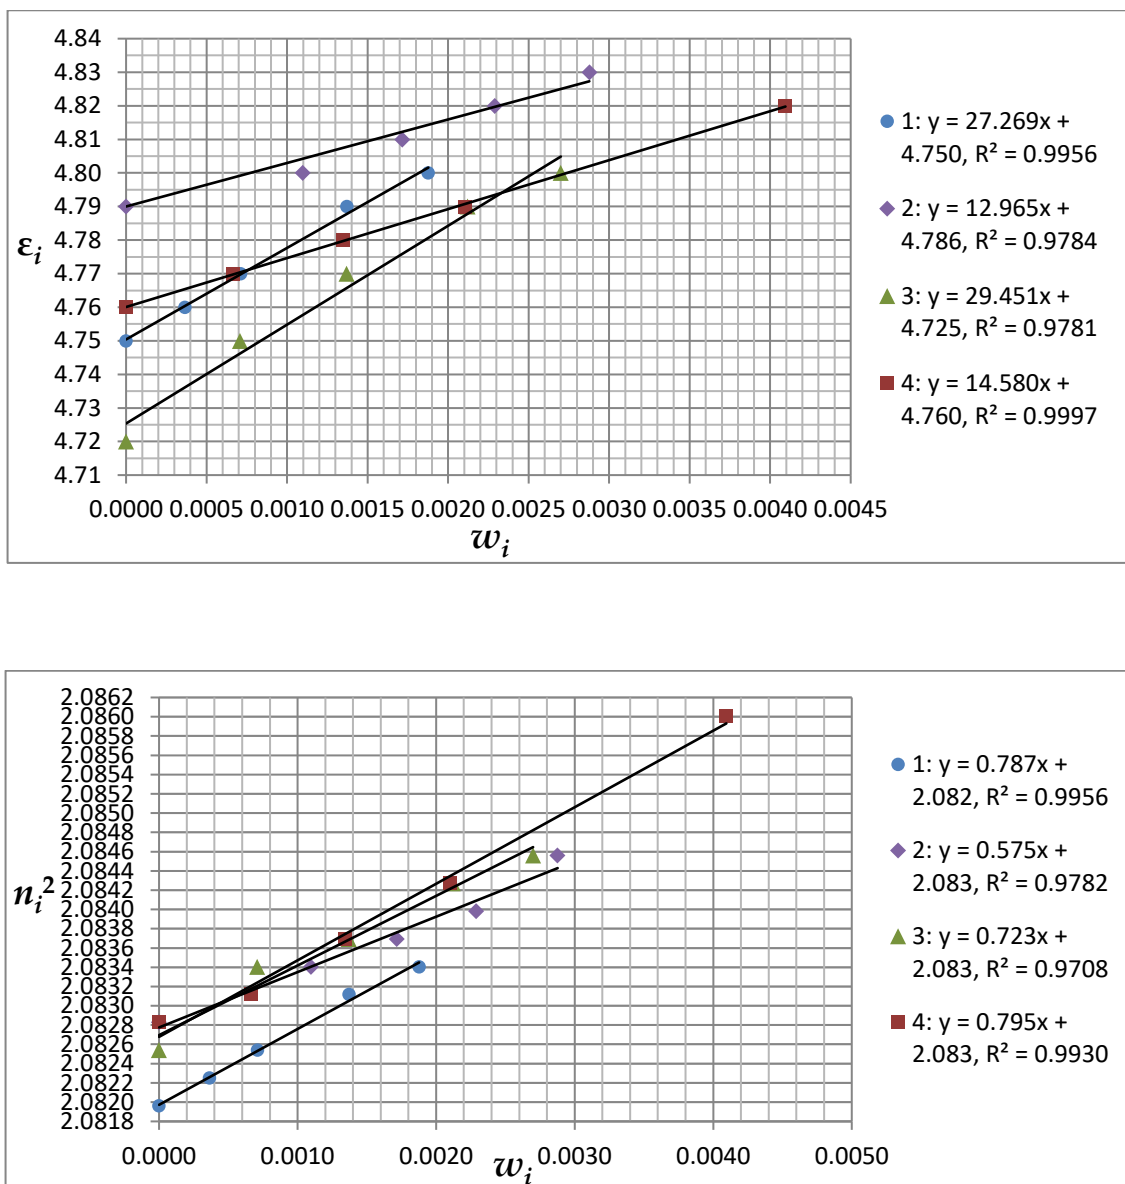

**Figure S1.** The  $\epsilon_i$ - $w_i$  and  $n_i^2$ - $w_i$  plots for compounds **1-4**, trichloromethane solutions.

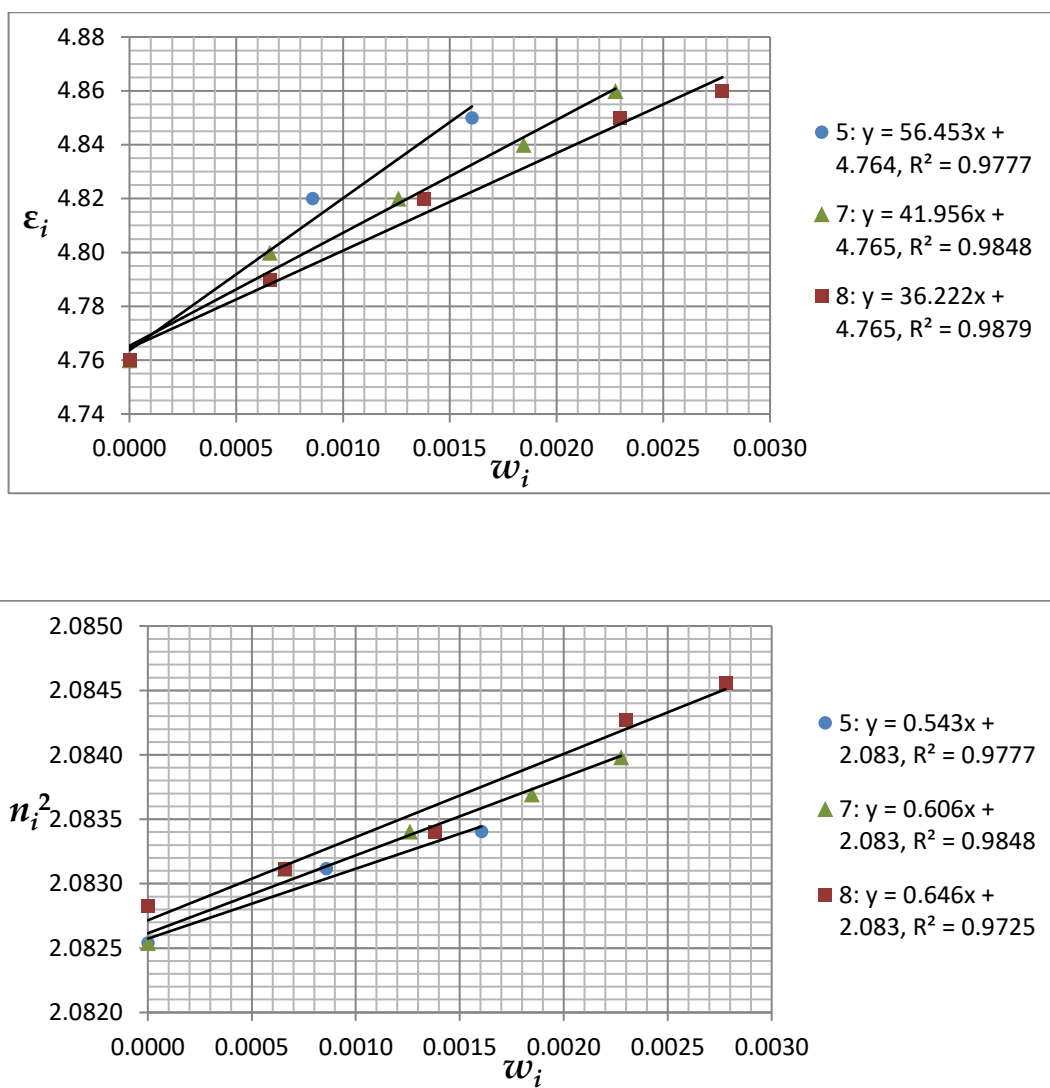

**Figure S2.** The  $\epsilon_i$ - $w_i$  and  $n_i^2$ - $w_i$  plots for compounds 5, 7, and 8, trichloromethane solutions.

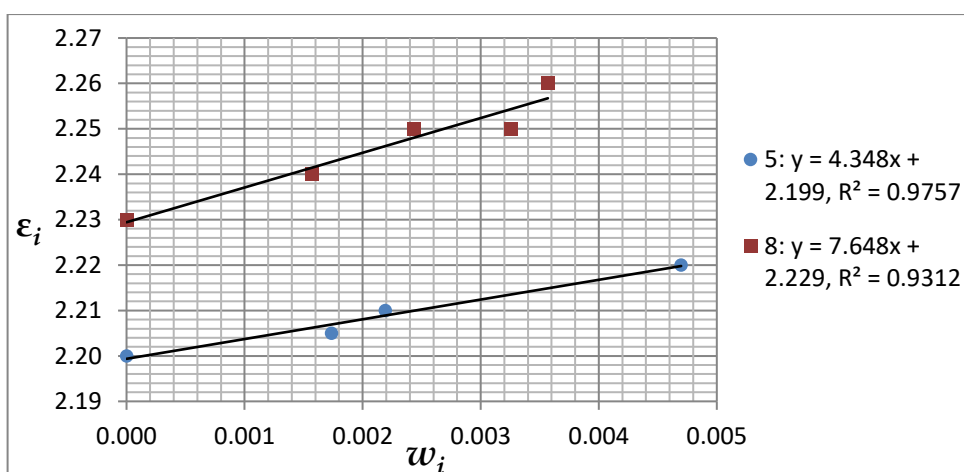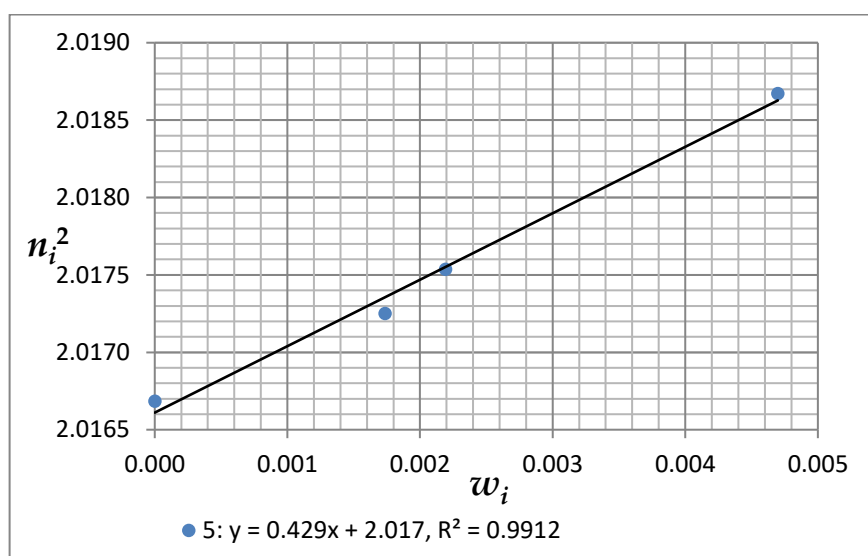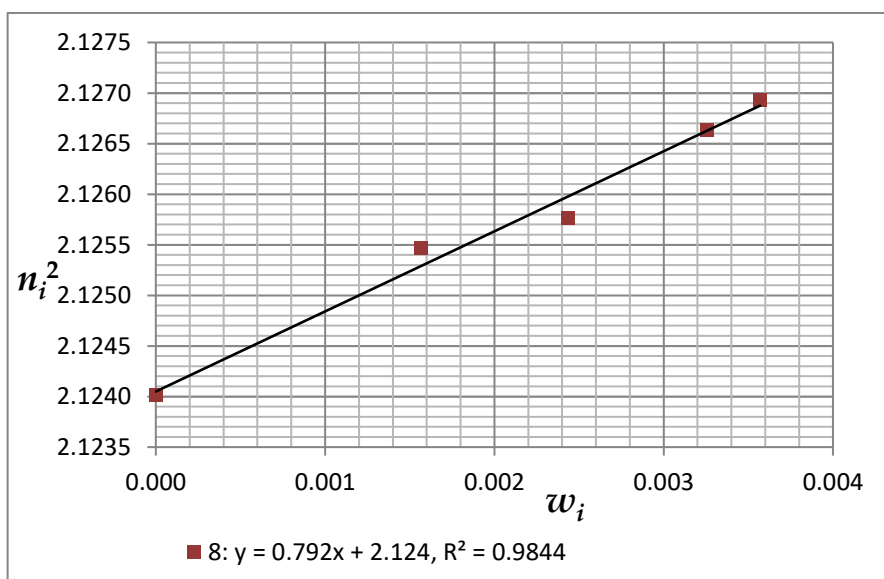

Figure S3. The  $\epsilon_i$ - $w_i$  and  $n_i^2$ - $w_i$  plots for compounds 5 (1,4-dioxane solutions) and 8 (tetrachloromethane solutions).

**Table S1.** Values of the slope ( $\alpha$  or  $\gamma$ ) and the intercept of the linear  $\varepsilon_i-w_i$  and  $n_i^2-w_i$  dependences and standard errors of regression parameters for compounds **1–5**, **7**, **8**.

| Solvent  |                    | $\varepsilon_i = \alpha \cdot w_i + c_1$ |                |       |              | $n_i^2 = \gamma \cdot w_i + c_2$ |                |        |              |
|----------|--------------------|------------------------------------------|----------------|-------|--------------|----------------------------------|----------------|--------|--------------|
|          |                    | $\alpha$                                 | $\Delta\alpha$ | $c_1$ | $\Delta c_1$ | $\gamma$                         | $\Delta\gamma$ | $c_2$  | $\Delta c_2$ |
| <b>1</b> | Trichloromethane   | 27.27                                    | 1.05           | 4.76  | 0.00         | 0.787                            | 0.030          | 2.0820 | 0.0000       |
| <b>2</b> | Trichloromethane   | 12.97                                    | 1.10           | 4.79  | 0.00         | 0.575                            | 0.050          | 2.0828 | 0.0001       |
| <b>3</b> | Trichloromethane   | 29.45                                    | 2.54           | 4.73  | 0.00         | 0.723                            | 0.072          | 2.0827 | 0.0001       |
| <b>4</b> | Trichloromethane   | 14.58                                    | 0.16           | 4.76  | 0.00         | 0.795                            | 0.038          | 2.0827 | 0.0001       |
| <b>5</b> | Trichloromethane   | 56.45                                    | 8.52           | 4.76  | 0.01         | 0.543                            | 0.082          | 2.0826 | 0.0001       |
|          | 1,4-Dioxane        | 4.35                                     | 0.49           | 2.20  | 0.00         | 0.429                            | 0.029          | 2.0166 | 0.0001       |
| <b>7</b> | Trichloromethane   | 41.96                                    | 3.01           | 4.77  | 0.00         | 0.606                            | 0.043          | 2.0826 | 0.0001       |
| <b>8</b> | Trichloromethane   | 36.22                                    | 2.32           | 4.76  | 0.00         | 0.646                            | 0.063          | 2.0827 | 0.0001       |
|          | Tetrachloromethane | 7.65                                     | 1.20           | 2.23  | 0.00         | 0.792                            | 0.057          | 2.1241 | 0.0001       |

**Table S2.** Selected vibration frequencies (cm<sup>-1</sup>) of **2–4**; theoretical values are listed for conformers **a–f**.

| Vibrations*                   | Experimental  |                |      | Gas phase |                    |                    |               |               |               | Solution (CPCM model) |                    |                    |               |               |               |
|-------------------------------|---------------|----------------|------|-----------|--------------------|--------------------|---------------|---------------|---------------|-----------------------|--------------------|--------------------|---------------|---------------|---------------|
|                               | Solid         | Solution       | Melt | 2a        | 2b                 | 2c                 | 2d            | 2e            | 2f            | 2a                    | 2b                 | 2c                 | 2d            | 2e            | 2f            |
| C–H <sub>(Pyridyl)</sub> (ω)  | 805           | -              | 802  | 822       | 819, 825           | 817, 828           | 822           | 821           | 819           | 823                   | 822                | 817, 825           | 823           | 823           | 820           |
| C–H <sub>(Ethyl)</sub> (τ, ρ) | 953, 975      | 925, 939       | 948  | 948       | 925, 949           | 911, 929, 953      | 919, 948, 969 | 927, 945, 969 | 958           | 950                   | 923, 952           | 902, 923, 956      | 926, 953, 970 | 930, 950, 971 | 959           |
| C–H <sub>(Pyridyl)</sub> (τ)  | 994           | 995            | 991  | 1013      | 1014               | 1015               | 1016          | 1012          | 1017          | 1015                  | 1014               | 1015               | 1015          | 1015          | 1015          |
| P=O (ν)                       | 1149, 1168    | 1167           | 1169 | 1211      | 1206               | 1204               | 1211          | 1196          | 1197          | 1181                  | 1183               | 1283               | 1183          | 1172          | 1172          |
| C–H <sub>(Pyridyl)</sub> (δ)  | 1415          | 1418           | 1414 | 1449      | 1449               | 1447               | 1449          | 1449          | 1447          | 1447                  | 1446               | 1447               | 1446          | 1446          | 1446          |
| C=C and C=N (ν)               | 1599          | 1603           | 1597 | 1647      | 1648               | 1648               | 1647          | 1646          | 1648          | 1648                  | 1647               | 1648               | 1647          | 1647          | 1647          |
|                               |               |                |      | <b>3a</b> | <b>3b</b>          | <b>3c</b>          | <b>3d</b>     | <b>3e</b>     | <b>3f</b>     | <b>3a</b>             | <b>3b</b>          | <b>3c</b>          | <b>3d</b>     | <b>3e</b>     | <b>3f</b>     |
| C–H <sub>(Pyridyl)</sub> (ω)  | 799, 807      | no             | 802  | 821       | 822                | 816, 822           | 822           | 820           | 821           | 823                   | 824                | 816, 822           | 822           | 822           | 823           |
| C–H <sub>(Ethyl)</sub> (τ, ρ) | 939, 956, 967 | 939, 953       | 952  | 945, 971  | 902, 923, 949, 964 | 905, 920, 932, 959 | 922, 949, 984 | 920, 964      | 939, 948, 972 | 950, 971              | 901, 924, 951, 963 | 902, 922, 934, 961 | 932, 949, 982 | 923, 964, 973 | 939, 950, 973 |
| C–H <sub>(Pyridyl)</sub> (τ)  | 994           | 995            | 991  | 1015      | 1015               | 1015               | 1014          | 1014          | 1013          | 1015                  | 1013               | 1014               | 1014          | 1014          | 1015          |
| C–H <sub>(Pyridyl)</sub> (δ)  | 1418          | 1417           | 1414 | 1 448     | 1447               | 1447               | 1447          | 1448          | 1449          | 1446                  | 1448               | 1447               | 1446          | 1449          | 1446          |
| C=C and C=N (ν)               | 1602          | 1603           | 1597 | 1648      | 1648               | 1648               | 1648          | 1648          | 1647          | 1647                  | 1647               | 1648               | 1647          | 1647          | 1647          |
|                               |               |                |      | <b>4a</b> | <b>4b</b>          | <b>4c</b>          | <b>4d</b>     | <b>4e</b>     | <b>4f</b>     | <b>4a</b>             | <b>4b</b>          | <b>4c</b>          | <b>4d</b>     | <b>4e</b>     | <b>4f</b>     |
| C–H <sub>(Pyridyl)</sub> (ω)  | 807           | no             |      | 822       | 822                | 815, 823           | 822           | 818           | 822           | 824                   | 816, 822           | 815, 821           | 822           | 820           | 824           |
| C–H <sub>(Ethyl)</sub> (τ, ρ) | 938, 956, 967 | 924, 939, 952, |      | 946, 967  | 902, 922, 949, 961 | 903, 921, 933, 960 | 923, 946, 982 | 963, 968      | 937, 948, 972 | 951, 963              | 902, 922, 952, 964 | 901, 921, 933, 963 | 925, 952, 976 | 962, 974      | 939, 951, 974 |
| C–H <sub>(Pyridyl)</sub> (τ)  | 995           | 995            |      | 1014      | 1014               | 1016               | 1014          | 1016          | 1013          | 1013                  | 1014               | 1013               | 1014          | 1015          | 1016          |
| C–H <sub>(Pyridyl)</sub> (δ)  | 1419          | 1418           |      | 1450      | 1449               | 1448               | 1448          | 1449          | 1449          | 1 447                 | 1446               | 1445               | 1446          | 1446          | 1447          |
| C=C and C=N (ν)               | 1602          | 1603           |      | 1647      | 1647               | 1649               | 1648          | 1647          | 1647          | 1648                  | 1647               | 1647               | 1647          | 1647          | 1647          |

\* ν – stretching, δ – scissoring, ρ – rocking, ω – wagging, τ – twisting

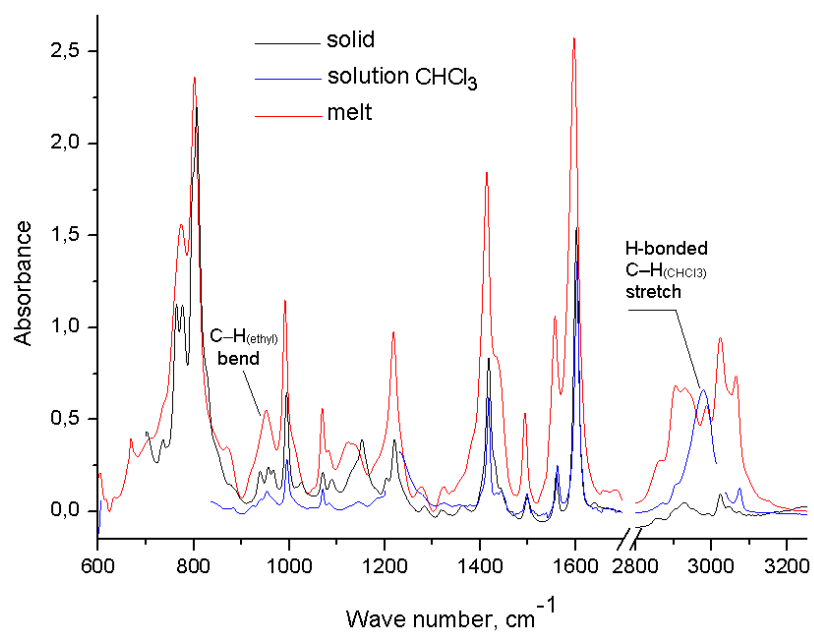

**Figure S4.** FT-IR spectra of compound 3 in different aggregate states.



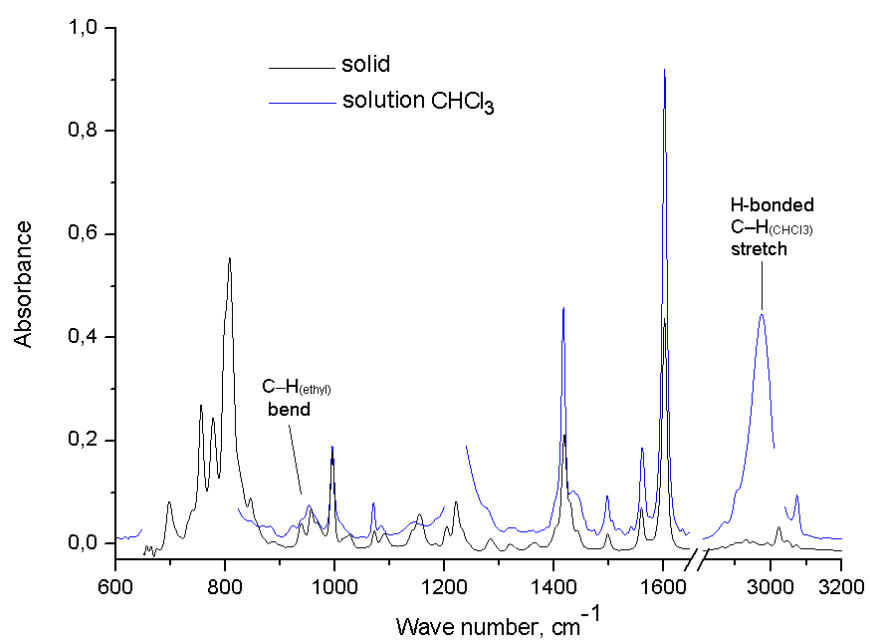

**Figure S5.** FT-IR spectra of compound **4** in different aggregate states.

**Table S3.** Selected vibration frequencies (cm<sup>-1</sup>) of **7**, **8**; theoretical values are listed for conformers **7a–c**, **7f**, **7h–j** and **8a–c**, **8e–g**, **8j**.

| Vibrations*                   | Experimental     |                       | Gas phase     |                     |                     |                     |                     |                             |                     | Solution (CPCM model) |                     |                     |               |                             |                     |                     |
|-------------------------------|------------------|-----------------------|---------------|---------------------|---------------------|---------------------|---------------------|-----------------------------|---------------------|-----------------------|---------------------|---------------------|---------------|-----------------------------|---------------------|---------------------|
|                               | Solid            | Solution              | 7a            | 7b                  | 7c                  | 7f                  | 7h                  | 7i                          | 7j                  | 7a                    | 7b                  | 7c                  | 7f            | 7h                          | 7i                  | 7j                  |
| C–H <sub>(Pyridyl)</sub> (ω)  | 798, 808         | no                    | 795           | 788,<br>797         | 778,<br>799         | 796,<br>801         | 794                 | 790,<br>799                 | 788,<br>797         | 798                   | 785,<br>799         | 777,<br>797         | 799           | 789,<br>798                 | 798                 | 793,<br>799         |
| C–H <sub>(Ethyl)</sub> (τ, ρ) | 940, 957,<br>968 | 939, 952,<br>965      | 950,<br>970   | 930,<br>955,<br>966 | 968                 | 953,<br>977,<br>989 | 951,<br>966         | 945,<br>974                 | 953,<br>978,<br>990 | 950,<br>971           | 930,<br>954,<br>966 | 964,<br>973         | 953,<br>977   | 953,<br>970                 | 943,<br>952,<br>973 | 953,<br>976         |
| C–H <sub>(Pyridyl)</sub> (τ)  | 995              | 997                   | 1012          | 1014                | 1012                | 1012                | 1013                | 1013                        | 1013                | 1012                  | 1013                | 1014                | 1013          | 1012                        | 1012                | 1013                |
| C–H <sub>(Pyridyl)</sub> (δ)  | 1419             | 1436                  | 1466,<br>1478 | 1465,<br>1474       | 1466,<br>1476       | 1467,<br>1476       | 1470                | 1467,<br>1476               | 1467,<br>1476       | 1464,<br>1473         | 1471                | 1472                | 1465,<br>1474 | 1463,<br>1472               | 1463,<br>1472       | 1465,<br>1470       |
| C–H <sub>(Pyridyl)</sub> (ρ)  | -                | 1475                  | 1510          | 1510                | 1508                | 1509                | 1509                | 1509                        | 1509                | 1508                  | 1510                | 1508                | 1509          | 1508                        | 1508                | 1509                |
| C=C and C=N (ν)               | 1602             | 1593                  | 1644          | 1643                | 1642                | 1642                | 1642                | 1642                        | 1642                | 1642                  | 1641                | 1641                | 1640          | 1642                        | 1642                | 1640                |
|                               |                  |                       | <b>8a</b>     | <b>8b</b>           | <b>8c</b>           | <b>8e</b>           | <b>8f</b>           | <b>8g</b>                   | <b>8j</b>           | <b>8a</b>             | <b>8b</b>           | <b>8c</b>           | <b>8e</b>     | <b>8f</b>                   | <b>8g</b>           | <b>8j</b>           |
| C–H <sub>(Pyridyl)</sub> (ω)  | 750, 766         | -                     | 765,<br>795   | 764,<br>785,<br>797 | 766,<br>775,<br>796 | 765,<br>795         | 761,<br>788,<br>796 | 764,<br>773,<br>788,<br>797 | 764,<br>773,<br>796 | 766,<br>799           | 764,<br>785,<br>797 | 765,<br>777,<br>798 | 767,<br>799   | 758,<br>767,<br>787,<br>799 | 768,<br>792         | 770,<br>797         |
| C–H <sub>(Ethyl)</sub> (τ, ρ) | 938, 948,<br>966 | 922, 939,<br>951, 965 | 949,<br>967   | 931,<br>954,<br>966 | 965                 | 953,<br>976,<br>988 | 951,<br>963         | 954,<br>978,<br>988         | 945,<br>954,<br>974 | 950,<br>965           | 955,<br>967         | 964,<br>973         | 954,<br>978   | 951,<br>968                 | 955,<br>976         | 943,<br>952,<br>975 |
| C–H <sub>(Pyridyl)</sub> (τ)  | 994              | 997                   | 1015          | 1014                | 1013                | 1012                | 1013                | 1013                        | 1013                | 1013                  | 1014                | 1012                | 1013          | 1013                        | 1014                | 1014                |
| C–H <sub>(Pyridyl)</sub> (δ)  | 1435             | 1437                  | 1465,<br>1477 | 1465,<br>1474       | 1467,<br>1476       | 1466,<br>1475       | 1470                | 1467,<br>1476               | 1467,<br>1476       | 1464,<br>1473         | 1463,<br>1472       | 1466,<br>1472       | 1465,<br>1474 | 1470                        | 1463,<br>1472       | 1466,<br>1472       |
| C–H <sub>(Pyridyl)</sub> (ρ)  | 1475             | 1475                  | 1510          | 1509                | 1508                | 1508                | 1509                | 1509                        | 1509                | 1509                  | 1507                | 1508                | 1507          | 1509                        | 1508                | 1507                |
| C=C and C=N (ν)               | 1589             | 1594                  | 1643          | 1643                | 1642                | 1641                | 1642                | 1642                        | 1642                | 1639                  | 1641                | 1642                | 1640          | 1640                        | 1641                | 1641                |

\* ν – stretching, δ – scissoring, ρ – rocking, ω – wagging, τ – twisting
